# Supplementary material
Source: Springer Nature journal article supplement (https://www.springermedizin.de/resource/supplementary/12960_2003_3_MOESM1_ESM.pdf/9569764)
Supplement: MOESM1 [file 9569764]

## Key indicators for monitoring and evaluation of HRH

| Indicator                                 | Description                                                                                                                                                                               | Numerator                                                                          | Denominator                                                        | Potential data sources                                                                                                                                                                                                                              | Comparability issues                                                                                                                                                                                                                                                            |
|-------------------------------------------|-------------------------------------------------------------------------------------------------------------------------------------------------------------------------------------------|------------------------------------------------------------------------------------|--------------------------------------------------------------------|-----------------------------------------------------------------------------------------------------------------------------------------------------------------------------------------------------------------------------------------------------|---------------------------------------------------------------------------------------------------------------------------------------------------------------------------------------------------------------------------------------------------------------------------------|
| <b>Health services provision function</b> |                                                                                                                                                                                           |                                                                                    |                                                                    |                                                                                                                                                                                                                                                     |                                                                                                                                                                                                                                                                                 |
| Stock of HRH                              | Proportion of HRH among the total population                                                                                                                                              | Number of health workers                                                           | Total population                                                   | <ul style="list-style-type: none"> <li>Census</li> <li>Labour force or other representative household survey</li> <li>Routine administrative records</li> </ul>                                                                                     | <ul style="list-style-type: none"> <li>Occupational classification</li> <li>Distinction between head-count (number of persons counted at a given moment) and full-time-equivalent (job positions counted and weighted on the basis of actual or usual working hours)</li> </ul> |
|                                           |                                                                                                                                                                                           | Number of health workers of economically active age                                | Total population of economically active age                        |                                                                                                                                                                                                                                                     |                                                                                                                                                                                                                                                                                 |
| Skills mix                                | Distribution of health workers with a given occupation, specialization or other skill-related characteristic among the total health workforce (and compared to other category of workers) | Number of health professionals                                                     | Total number of health workers                                     | <ul style="list-style-type: none"> <li>Census</li> <li>Labour force or other household survey</li> <li>Representative facility/provider survey</li> <li>Routine records</li> </ul>                                                                  | <ul style="list-style-type: none"> <li>Occupational classification</li> <li>Distinction between head-count and full-time-equivalent (with attention to definition of full-time hours)</li> </ul>                                                                                |
|                                           |                                                                                                                                                                                           | Number of physicians                                                               | Number of nurses and midwives                                      |                                                                                                                                                                                                                                                     |                                                                                                                                                                                                                                                                                 |
|                                           |                                                                                                                                                                                           | Number of medical specialists                                                      | Number of medical generalists                                      |                                                                                                                                                                                                                                                     |                                                                                                                                                                                                                                                                                 |
| Migration status                          | Proportion of foreign-born or foreign-trained health workers in the total health workforce                                                                                                | Number of health workers who were born in a foreign country                        | Total number of health workers                                     | <ul style="list-style-type: none"> <li>Census</li> <li>Labour force or other household survey</li> <li>Facility/ provider survey</li> <li>Routine records</li> <li>Special studies on migration (registries of work permits/entry visas)</li> </ul> | <ul style="list-style-type: none"> <li>Consistency in occupational and educational classification between the country of origin and the receiving country</li> </ul>                                                                                                            |
|                                           |                                                                                                                                                                                           | Number of health workers who received their academic training in a foreign country | Total number of health workers                                     |                                                                                                                                                                                                                                                     |                                                                                                                                                                                                                                                                                 |
| Labour force activity                     | Proportion with health-related skills active in the labour force, currently employed, or currently working in a health-related industry                                                   | Number with health-related skills active in the labour force                       | Total number with health-related skills of economically active age | <ul style="list-style-type: none"> <li>Census</li> <li>Labour force or other household survey</li> </ul>                                                                                                                                            | <ul style="list-style-type: none"> <li>Occupational, industrial and educational classifications</li> <li>Definition of age range for economic activity</li> </ul>                                                                                                               |
|                                           |                                                                                                                                                                                           | Number with health-related skills currently employed                               | Total number with health-related skills active in the labour force |                                                                                                                                                                                                                                                     |                                                                                                                                                                                                                                                                                 |
|                                           |                                                                                                                                                                                           | Number with health-related skills currently working in a health-related industry   | Total number with health-related skills currently employed         |                                                                                                                                                                                                                                                     |                                                                                                                                                                                                                                                                                 |

| Indicator                                        | Description                                                                                                                                                     | Numerator                                                                                                                                                    | Denominator                                                                                                               | Potential data sources                                                                                                                                                                                                                                 | Comparability issues                                                                                                                                                                                                                                           |
|--------------------------------------------------|-----------------------------------------------------------------------------------------------------------------------------------------------------------------|--------------------------------------------------------------------------------------------------------------------------------------------------------------|---------------------------------------------------------------------------------------------------------------------------|--------------------------------------------------------------------------------------------------------------------------------------------------------------------------------------------------------------------------------------------------------|----------------------------------------------------------------------------------------------------------------------------------------------------------------------------------------------------------------------------------------------------------------|
| Institutional sector                             | Proportion of health workers engaged in the private sector                                                                                                      | Number of health workers employed in the private sector                                                                                                      | Total number of health workers                                                                                            | <ul style="list-style-type: none"> <li>• Census</li> <li>• Labour force or other household survey</li> <li>• Facility/ provider survey</li> <li>• Routine records</li> </ul>                                                                           | <ul style="list-style-type: none"> <li>• Occupational classification</li> <li>• Distinction between operating authority of the place of work and person's employment status</li> </ul>                                                                         |
| Income / earnings                                | Relative income/earnings among health workers                                                                                                                   | Average annual income, occupational earnings or hourly wages among health workers                                                                            | Average annual income, occupational earnings or hourly wages among all workers in the labour force                        | <ul style="list-style-type: none"> <li>• Census</li> <li>• Labour force or other household survey</li> <li>• Routine records</li> <li>• Special studies on personal income (such as income tax records)</li> </ul>                                     | <ul style="list-style-type: none"> <li>• Occupational classification</li> <li>• Distinction between net and gross income, and between sources of income (including informal sources)</li> <li>• Definition of reference period for income reporting</li> </ul> |
| Distribution of HRH by location / gender / other | Proportion of health workers working in a given geographical location, being female, or having another specific characteristic among the total health workforce | Number of health workers working in urban areas (or other epidemiological or economic region)                                                                | Total number of health workers                                                                                            | <ul style="list-style-type: none"> <li>• Census</li> <li>• Labour force or other household survey</li> <li>• Facility/provider survey</li> <li>• Routine records</li> </ul>                                                                            | <ul style="list-style-type: none"> <li>• Occupational classification</li> <li>• Definition of urbanity or other geographical delimitation</li> </ul>                                                                                                           |
|                                                  |                                                                                                                                                                 | Number of health workers who are female                                                                                                                      | Total number of health workers                                                                                            |                                                                                                                                                                                                                                                        |                                                                                                                                                                                                                                                                |
| Gender gap in income / earnings                  | Ratio of women's to men's income/earnings in the health workforce                                                                                               | Average annual income, occupational earnings or hourly wages among female health workers                                                                     | Average annual income, occupational earnings or hourly wages among male health workers                                    | <ul style="list-style-type: none"> <li>• Census</li> <li>• Labour force or other household survey</li> <li>• Facility/provider survey</li> <li>• Routine records</li> <li>• Special studies on personal income (such as income tax records)</li> </ul> | <ul style="list-style-type: none"> <li>• Occupational classification</li> <li>• Distinction between net and gross income, and between sources of income</li> <li>• Definition of reference period for income reporting</li> </ul>                              |
| Provider productivity                            | Relative number of specific tasks performed over a defined period of time among health workers                                                                  | Average number of specific tasks performed over a defined period of time (ambulatory visits, immunizations, surgeries, etc.) by a given health care provider | Total number of specific tasks performed over the same period of time among all health care providers (or other standard) | <ul style="list-style-type: none"> <li>• Facility/provider survey</li> <li>• Routine records (facility- or provider-based)</li> </ul>                                                                                                                  | <ul style="list-style-type: none"> <li>• Occupational and industrial classifications</li> </ul>                                                                                                                                                                |

| Indicator                                                              | Description                                                                                                                                | Numerator                                                                                             | Denominator                                                                                    | Potential data sources                                                                                                                                                       | Comparability issues                                                                                                                                                                   |
|------------------------------------------------------------------------|--------------------------------------------------------------------------------------------------------------------------------------------|-------------------------------------------------------------------------------------------------------|------------------------------------------------------------------------------------------------|------------------------------------------------------------------------------------------------------------------------------------------------------------------------------|----------------------------------------------------------------------------------------------------------------------------------------------------------------------------------------|
| <b>Resource generation function</b>                                    |                                                                                                                                            |                                                                                                       |                                                                                                |                                                                                                                                                                              |                                                                                                                                                                                        |
| Renewal and loss of HRH                                                | Ratio of new arrivals to the health workforce                                                                                              | Number of new entrants or graduates at health training institutions                                   | Total number of health workers                                                                 | <ul style="list-style-type: none"> <li>Census</li> <li>Labour force or other household survey</li> <li>Surveys or routine records of health training institutions</li> </ul> | <ul style="list-style-type: none"> <li>Occupational and educational classifications</li> <li>Distinction in average length of training program or average age at completion</li> </ul> |
|                                                                        |                                                                                                                                            | Number of health workers aged 30 years or less (or other age group)                                   | Total number of health workers                                                                 |                                                                                                                                                                              |                                                                                                                                                                                        |
| Education and training                                                 | Proportion of health workers with tertiary-level educational attainment among the total health workforce                                   | Number of health workers with tertiary-level educational attainment (or other level)                  | Total number of health workers                                                                 | <ul style="list-style-type: none"> <li>Census</li> <li>Labour force or other household survey</li> <li>Facility/provider survey</li> <li>Routine records</li> </ul>          | <ul style="list-style-type: none"> <li>Occupational and educational classifications</li> </ul>                                                                                         |
|                                                                        | Proportion of health workers having undertaken continuous education program within a given period of time among the total health workforce | Number of health workers having undertaken continuous education program within a given period of time | Total number of health workers                                                                 |                                                                                                                                                                              |                                                                                                                                                                                        |
| Distribution of health education entrants by location / gender / other | Proportion of entrants at health training institutions having a specific characteristic                                                    | Number of entrants at health training institutions from rural or poor areas                           | Total number of entrants at health training institutions                                       | <ul style="list-style-type: none"> <li>Surveys or routine records of health training institutions</li> </ul>                                                                 | <ul style="list-style-type: none"> <li>Educational classification</li> <li>Definition of geographical delimitation</li> </ul>                                                          |
|                                                                        |                                                                                                                                            | Number of entrants at health training institutions who are female                                     | Total number of entrants at health training institutions                                       |                                                                                                                                                                              |                                                                                                                                                                                        |
| Costs of training                                                      | Average health training cost per student                                                                                                   | Total costs (fixed and renewable) for a given academic program at health training institutions        | Total number of students enrolled in the same academic program at health training institutions | <ul style="list-style-type: none"> <li>Surveys or routine records of health training institutions</li> </ul>                                                                 | <ul style="list-style-type: none"> <li>Educational classification</li> <li>Distinction between types of costs, and average length of training program</li> </ul>                       |
